# Supplementary material for: Effect of optimized thrombus aspiration on myocardial perfusion and prognosis in acute ST-segment elevation myocardial infarction patients with primary percutaneous coronary intervention
Source: Frontiers journal article supplement (doi:10.3389/fcvm.2023.1249924), 2023-10-04
Supplement: Data_Sheet_1.PDF [file Data_Sheet_1.PDF]

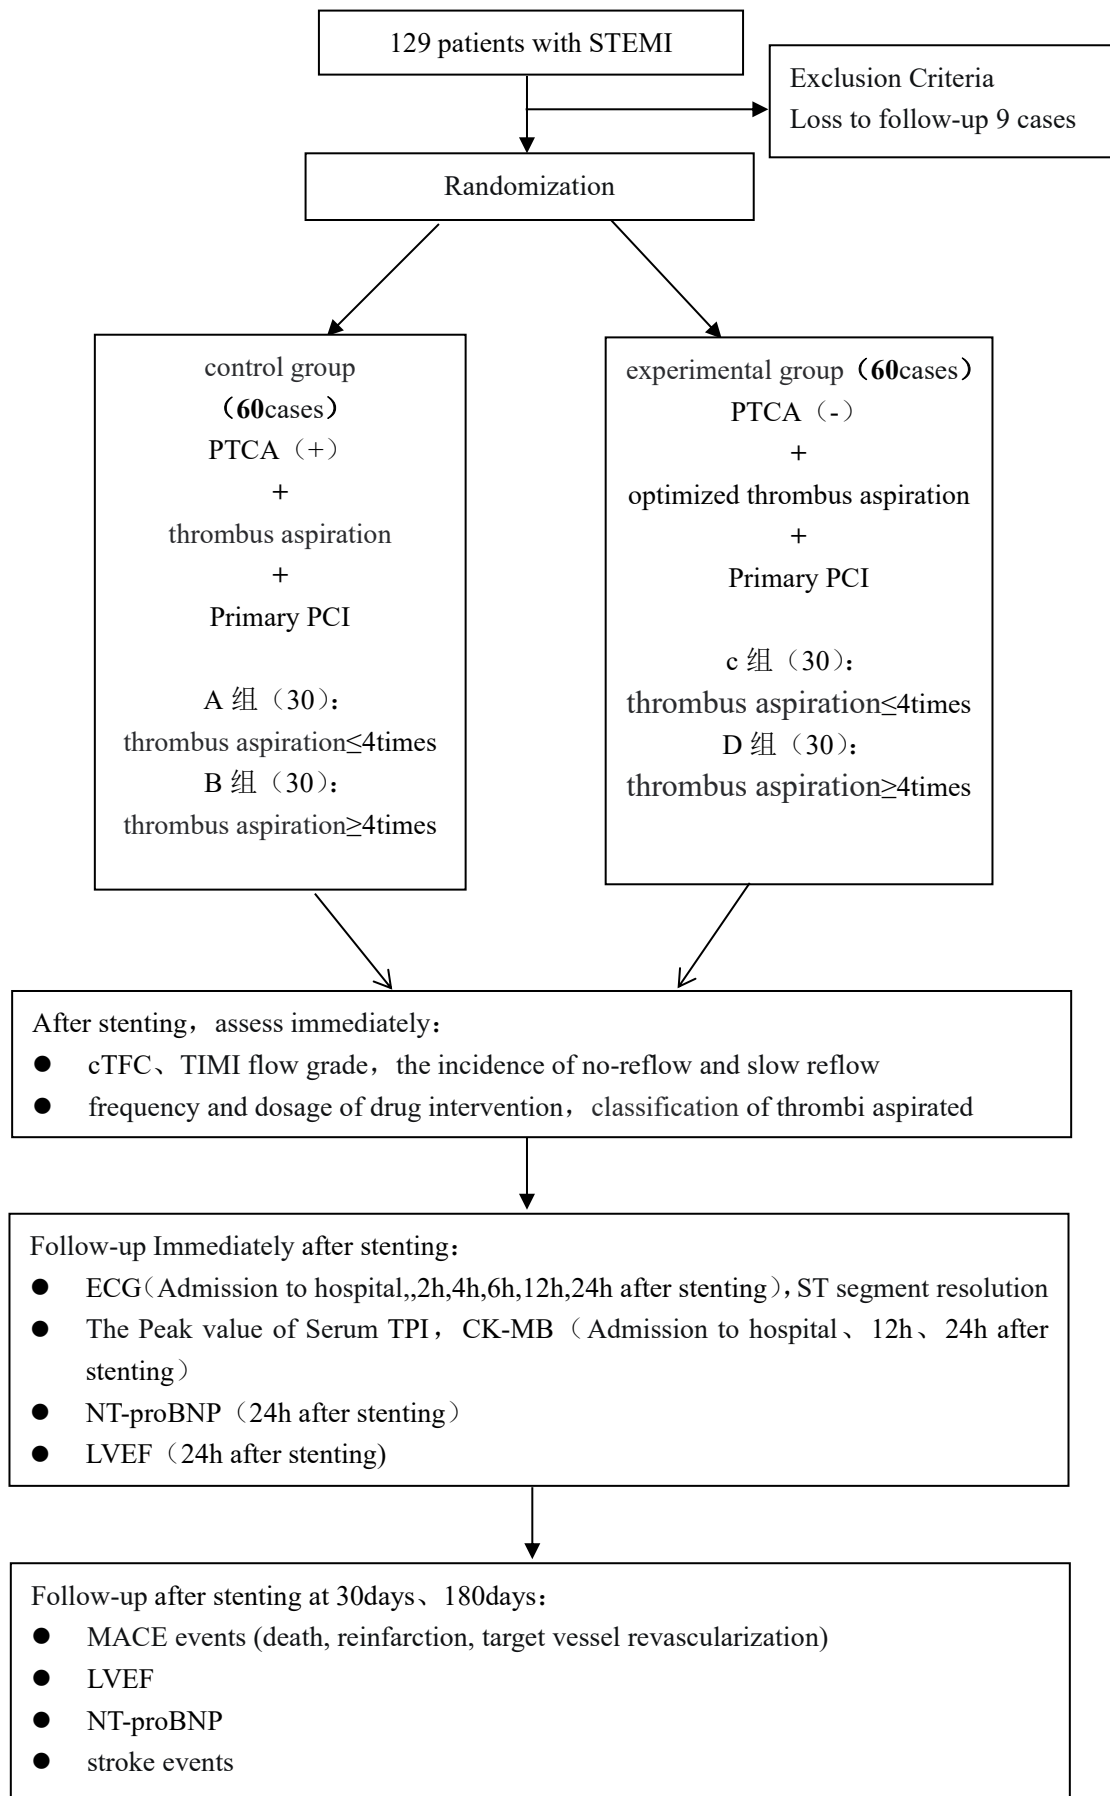

Attached Figure 1: Experimental Design Process
